# Supplementary material for: Altering Nitrogen Sources Affects Growth Carbon Costs in Vachellia nilotica Growing in Nutrient-Deficient Grassland Soils
Source: MDPI journal article supplement (doi:10.3390/plants10091762), 2021-08-25
Supplement: s1 [file s1]

**Supplementary Table S1.** Soil characteristics determined from the nutrient addition trials at Ukulinga Farm, KwaZulu-Natal. Values represent mean  $\pm$  SE, based on n = 4. Significant differences ( $p < 0.05$ ) among treatments are denoted by different superscript letters.

| Parameter                  | Treatment trials              |                               |                               |                               |                               |                               |
|----------------------------|-------------------------------|-------------------------------|-------------------------------|-------------------------------|-------------------------------|-------------------------------|
|                            | N1                            | N2                            | N3                            | N1+P                          | N2+P                          | N3+P                          |
| <b>Soil macronutrients</b> |                               |                               |                               |                               |                               |                               |
| ( $\mu\text{mol g}^{-1}$ ) |                               |                               |                               |                               |                               |                               |
| Leco N concentration       | 0.27 $\pm$ 0.01 <sup>a</sup>  | 0.32 $\pm$ 0.01 <sup>c</sup>  | 0.31 $\pm$ 0.00 <sup>bc</sup> | 0.31 $\pm$ 0.01 <sup>bc</sup> | 0.28 $\pm$ 0.01 <sup>ab</sup> | 0.29 $\pm$ 0.01 <sup>ac</sup> |
| P concentration            | 0.07 $\pm$ 0.013 <sup>a</sup> | 0.16 $\pm$ 0.05 <sup>bc</sup> | 0.10 $\pm$ 0.01 <sup>ab</sup> | 0.21 $\pm$ 0.01 <sup>c</sup>  | 0.20 $\pm$ 0.04 <sup>c</sup>  | 0.22 $\pm$ 0.04 <sup>c</sup>  |
| K concentration            | 3.81 $\pm$ 0.58 <sup>b</sup>  | 3.07 $\pm$ 0.58 <sup>ab</sup> | 4.29 $\pm$ 0.81 <sup>b</sup>  | 3.14 $\pm$ 0.27 <sup>ab</sup> | 1.74 $\pm$ 1.45 <sup>a</sup>  | 1.45 $\pm$ 0.14 <sup>a</sup>  |
| <b>Relative acidity</b>    |                               |                               |                               |                               |                               |                               |
| Exchangeable acidity       | 0.22 $\pm$ 0.06 <sup>a</sup>  | 0.75 $\pm$ 0.30 <sup>b</sup>  | 1.57 $\pm$ 0.23 <sup>c</sup>  | 0.13 $\pm$ 0.01 <sup>a</sup>  | 0.23 $\pm$ 0.05 <sup>a</sup>  | 1.02 $\pm$ 0.23 <sup>bc</sup> |
| ( $\text{cmmol L}^{-1}$ )  |                               |                               |                               |                               |                               |                               |
| Moisture factor (g/g)      | 1.07 $\pm$ 0.03 <sup>a</sup>  | 1.08 $\pm$ 0.00 <sup>b</sup>  | 1.08 $\pm$ 0.00 <sup>b</sup>  | 1.08 $\pm$ 0.00 <sup>b</sup>  | 1.08 $\pm$ 0.00 <sup>ab</sup> | 1.08 $\pm$ 0.00 <sup>ab</sup> |
| pH (KCl)                   | 4.67 $\pm$ 0.07 <sup>bc</sup> | 4.46 $\pm$ 0.09 <sup>ab</sup> | 4.12 $\pm$ 0.04 <sup>a</sup>  | 4.77 $\pm$ 0.04 <sup>bc</sup> | 5.01 $\pm$ 0.37 <sup>c</sup>  | 4.18 $\pm$ 0.04 <sup>ab</sup> |
| pH (H <sub>2</sub> O)      | 5.63 $\pm$ 0.07 <sup>c</sup>  | 5.45 $\pm$ 0.10 <sup>bc</sup> | 4.61 $\pm$ 0.14 <sup>a</sup>  | 5.72 $\pm$ 0.06 <sup>c</sup>  | 5.86 $\pm$ 0.27 <sup>c</sup>  | 4.91 $\pm$ 0.12 <sup>ab</sup> |

**Supplementary Table S2.** The molecular identification of soil and plant isolated nitrogen-fixing bacteria.

| Nitrogen-fixing bacteria |               |                | Treatment (s) |
|--------------------------|---------------|----------------|---------------|
| Strains                  | Accession No. | Similarity (%) |               |

---

|                                                                 |                      |        |           |       |                                           |
|-----------------------------------------------------------------|----------------------|--------|-----------|-------|-------------------------------------------|
| <b>Soil isolated nitrogen-fixing bacteria</b>                   |                      |        |           |       |                                           |
| <i>Caulobacter</i><br>IMCC34905                                 | <i>rhizosphaerae</i> | strain | MK 138628 | 97.38 | N1, N2, N3, N1 + P,<br>N2 + P, and N3 + P |
| <i>Sphingomonas</i> sp.                                         | N-9                  |        | LC 101917 | 97.82 | N1, N2, N3                                |
| <i>Burkholderia</i><br>J8A6SARS                                 | <i>contaminans</i>   | strain | MT 409575 | 99.01 | N1 + P, N2 +P, and N3<br>+ P              |
| <b>Plant root nodule isolated nitrogen-<br/>fixing bacteria</b> |                      |        |           |       |                                           |
| <i>Mesorhizobium</i> sp.                                        | BwIS3– 11            |        | KX 959579 | 98.01 | N2 + P                                    |
| <i>Mesorhizobium</i> sp.                                        | strain BwIS3-17      |        | KX 959577 | 98.00 | N3 + P                                    |

---
